# Supplementary material for: The detection of a non-anemophilous plant species using airborne eDNA
Source: PLoS One. 2019 Nov 20;14(11):e0225262. doi: 10.1371/journal.pone.0225262 (PMC6867632; doi:10.1371/journal.pone.0225262)
Supplement: S2 File — (XLSX) [file pone.0225262.s002.xlsx]

## Sheet: Sheet1
							Bouteloua Genus Sample Quantities (pg/µl)							Honey Mesquite Sample Quantities (pg/µl)
							Trap	Event 1	Event 2	Event 3	Event 4	Event 5		Trap	Event 1	Event 2	Event 3	Event 4	Event 5
							1	0	0	0	0.0257808	Trap Damage		1	0	0	0	0	Trap Damage
							1	0.00653217	0	0.0191839	0.220492	Trap Damage		1	0	0	0	0	Trap Damage
							1	0.0434225	0	0.0130171	0.191256	Trap Damage		1	0	0	0	0	Trap Damage
							2	0	0	0	0	0.436442		1	0	0	0	0	Trap Damage
							2	0	0	0.0638254	0	0.407031		1	0	0	0	0	Trap Damage
							2	0	0	0	0.0484425	0.325246		2	0	0	0	0	0
							3	0	0	0	0.110594	1.28407		2	0	0	0	0	0
							3	0	0	0	0.179452	1.40129		2	0	0	0	0	0
							3	0	0	0	0.200125	1.76609		2	0	0	0	0	0
							4	0.00571144	0	0	0.543133	6.2675		2	0	0	0	0	0
							4	0	0	0	0.22216	6.68369		3	0	0	0	0	0
							4	0	0	0	0.566922	6.66357		3	0	0	0	0	0
							5	0	0	0	0.184831	1.37463		3	0	0	0	0	0
							5	0	0	0	0.0719419	1.28083		3	0.532965	0	0	0	0
							5	0	0	0	0.077712	1.21977		3	0.254519	0	0	0	0
							6	0	0	0	0.0297974	1.2895		4	0	0	0	0	0
							6	0.00120363	0	0	0.0788113	1.47725		4	0	0	0	0	0
							6	0	0.00653946	0	0.0723911	1.06976		4	0	0	0	0	0
							7	0	0	0	0.687874	3.36395		4	0	0	0	0	0
							7	0	0	0	0.403437	2.70944		4	0	0	0	0	0
							7	0	0	0	0.388116	2.36502		5	0	0	0	0	0
							8	0.00173171	0.0392607	0	0.541361	6.31112		5	0	0	0	0	0
							8	0.0554007	0.0444214	0	0.724983	6.47523		5	0	0	0	0	0
							8	0.00992369	0.0324188	0	0.641667	6.2894		5	0	0	0	0	0
							9	0	0	0	0.0823207	4.73334		5	0	0	0	0	0
							9	0	0	0	0.308751	4.33565		6	0.354508	0	0	0	0
							9	0	0	0	0.299062	3.74617		6	0.260128	0	0	0	0
														6	0	0	0	0	0
														6	0	0	0	0	0
														6	0	0	0	0	0
														7	0	0	0	0	0
														7	0	0	0	0	0
														7	0	0	0	0	0
														7	0	0	0	0	0
														7	0	0	0	0	0
														8	0	0	0	0	(+) but no quantitiy
														8	0.460578	0	0	0	(+) but no quantitiy
														8	0.514513	0.539781	0	0	(+) but no quantitiy
														8	0	0	0	0	(+) but no quantitiy
														8	0.659581	0.427379	0	0	(+) but no quantitiy
														9	0	0	0	0	(+) but no quantitiy
														9	0	0	0	0	(+) but no quantitiy
														9	0	0	0	0	(+) but no quantitiy
														9	0	0	0	0	(+) but no quantitiy
														9	0	0	0	0	(+) but no quantitiy
